# Supplementary material for: Genomic analysis of oral Campylobacter concisus strains identified a potential bacterial molecular marker associated with active Crohn’s disease
Source: PubMed Central journal article supplement (PMC5893538; doi:10.1038/s41426-018-0065-6), 2018-04-11

Supplementary Figure S2

**A**

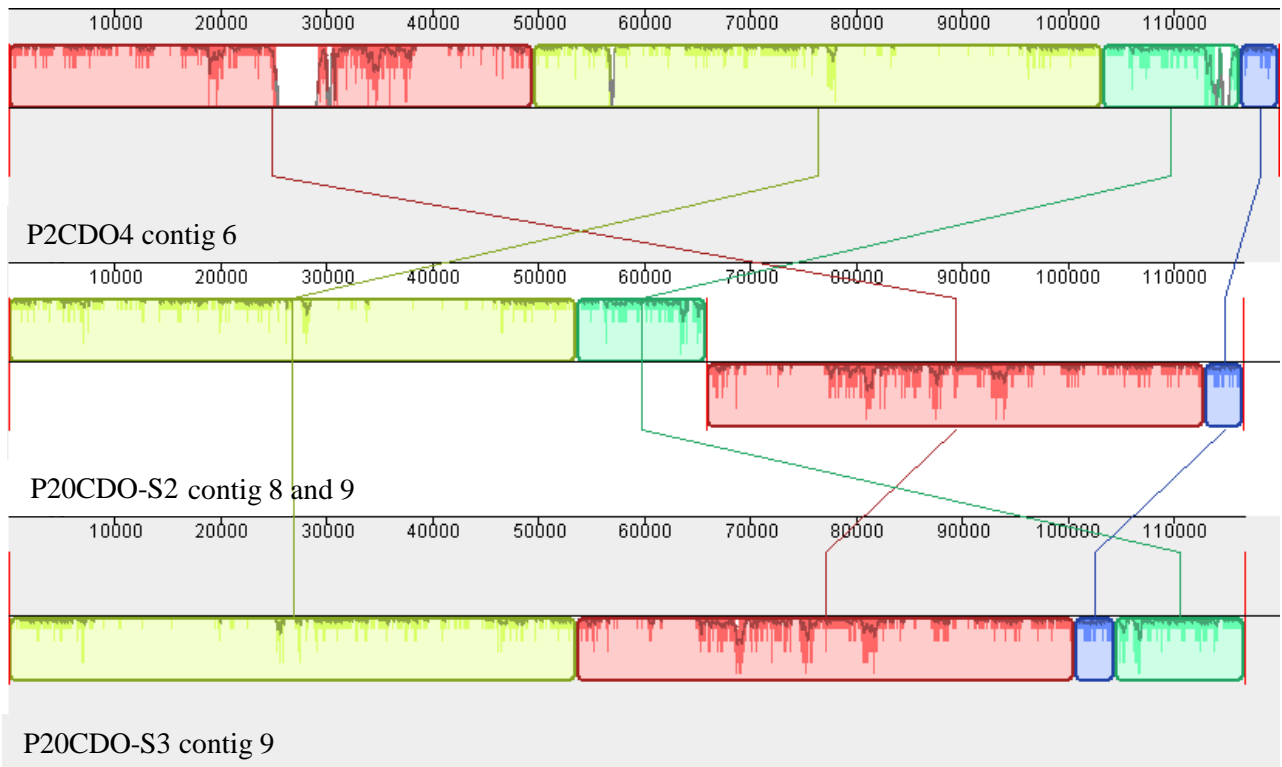

**B**

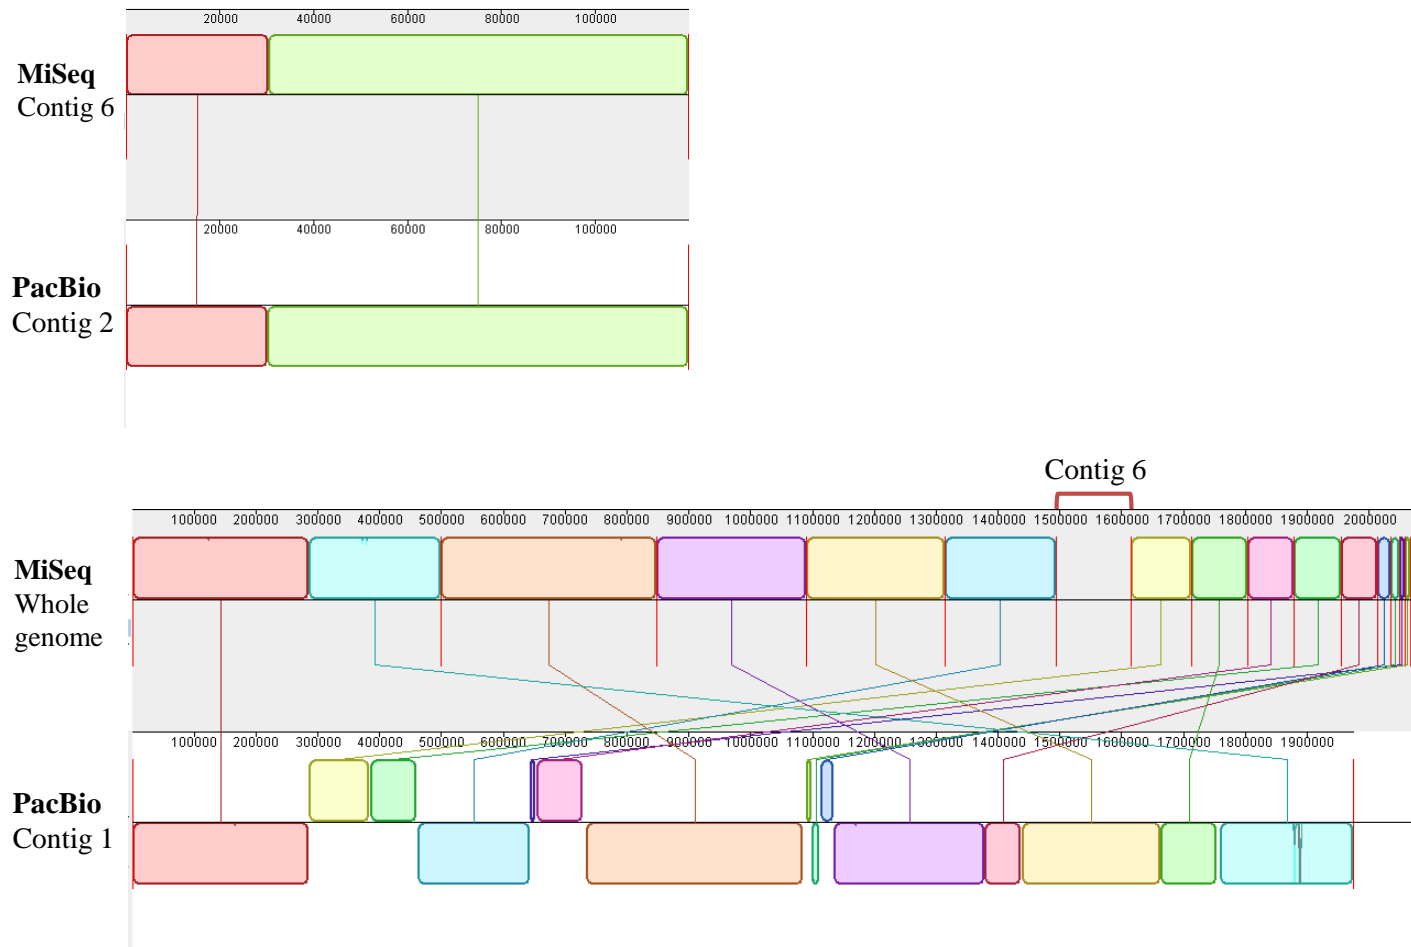

Supplement: 41426_2018_65_MOESM4_ESM.pdf [file 41426_2018_65_MOESM4_ESM.pdf]
