# Supplementary material for: Genomic analysis of oral Campylobacter concisus strains identified a potential bacterial molecular marker associated with active Crohn’s disease
Source: PubMed Central journal article supplement (PMC5893538; doi:10.1038/s41426-018-0065-6), 2018-04-11
Supplement: 41426_2018_65_MOESM5_ESM.pdf [file 41426_2018_65_MOESM5_ESM.pdf]

### Supplementary Figure S3

```

P2CD04_csep1P      ATGAAAAAGCAAATTTTAGCTTCAGTCTTAGCCAGCGTGTGGCCACAAGTAGCGTATAT 60
P13UCO-S3_csep1P  ATGAAAAAGCAAATTTTAGCTTCAGTCTTAGCCAGCGTGTGGCCACAAGTAGCGTATAT 60
P26UCO-S1_csep1C  ATGAAAAAGCAAATTTTAGCTTCAGTATTAGCCAGCGTGTAGCCACAAGTAGCGTATAT 60
P2CD04_csep1C      ATGAAAAAGCAAATTTTAGCTTCAGTCTTAGCCAGTGTGTAGCCATAAGTAGCGTATAT 60
P20CDO-S2_csep1P  ATGAAAAAGCAAATTTTAGCTTCAGTCTTAGCCAGCGTGTGGCCACAAGTAGCGTATAT 60
P20CDO-S3_csep1P  ATGAAAAAGCAAATTTTAGCTTCAGTCTTAGCCAGCGTGTGGCCACAAGTAGCGTATAT 60
P16UCO-S2_csep1C  ATGAAAAAGCAAATTTTAGCTTCAGTCTTAGTTGGCGCTTTGGCTGTAAGTAGTGCTTCA 60
H110-S2_csep1C     ATGAAAAAGCAAATTTTAGCTTCAGTCTTAGCTAGCGTGTGGCCACAAGTAGCGTATAT 60
P11CDO-S1_csep1C  ATGAAAAAGCAAATTTTAGCTTCAGTATTAGCCAGCGTGTGGCCACAAGTAGCGTATAT 60
P7UCO-S2_csep1C   ATGAAAAAGCAAATTTTAGCTTCAGTCTTAGCCAGCGCGTTGGCCACAAGTAGCGTATAT 60
H90-S1_csep1C      ATGAAAAAGCAAATTTTAGCTTCAGTCTTAGCCAGCGCGTTGGCCACAAGTAGCGTATAT 60
H200-S1_csep1C     ATGAAAAAGCAAATTTTAGCTTCAGTCTTAGCTAGCGTGTGGCCACAAGTAGCGTATAT 60
P18CDO-S1_csep1C  ATGAAAAAGCAAATTTTAGCTTCAGTCTTAGCCAGCGTTTTAGCCACAAGTAGCGTATAT 60
H90-S2_csep1C      ATGAAAAAGCAAATTTTAGCTTCTATTCTAGTTGGTGCGCTTGCTGTAAGTAGTGCTTCA 60
P13UCO-S1_csep1C  ATGAAAAAGCAAATTTTAGCTTCAGTCTTAGCCAGCGTGTAGCCACAAGTAGCGTATAT 60
P27CDO-S1_csep1C  ATGAAAAAGCAAATTTTAGCTTCAGTCTTAGCCAGCGTGTAGCCACAAGTAGCGTATAT 60
H290-S1_csep1C     ATGAAAAAGCAAATTTTAGCTTCAGTCTTAGCCAGCGTGTAGCCACAAGTAGCGTATAT 60
P2CD03_csep1C      ATGAAAAAGCAAATTTTAGCTTCAGTCTTAGCCAGCGTGTGGCCACAAGTAGCGTATAT 60
P2CDO-S6_csep1C   ATGAAAAAGCAAATTTTAGCTTCAGTCTTAGCCAGCGTGTGGCCACAAGTAGCGTATAT 60
P1CDO3_csep1C      ATGAAAAAGCAAATTTTAGCTTCTGTCTAGTTGGCGCTTTGACTGCAGGTAGTGCTTCA 60
P20CDO-S1_csep1C  ATGAAAAAGCAAATTTTAGCTTCAATCTTAGCCAGCGTGTGGCCACAAGTAGCGTATAT 60
P20CDO-S3_csep1C  ATGAAAAAGCAAATTTTAGCTTCAATCTTAGCCAGCGTGTGGCCACAAGTAGCGTATAT 60
H301_csep1C        ATGAAAAAGCAAATTTTAGCTTCAGTCTTAGCCAGCGTGTGGCCACAAGTAGCGTATAT 60
P11CDO-S1_csep1C2 ATGAAAAAGCAAATTTTAGCTTCAGTATTAGCCAGCGTGTGGCCACAAGTAGCGTATAT 60
P21CDO-S2_csep1C  ATGAAAAAGCAAATTTTAGCTTCAGTCTTAGCCAGTGTGTAGCCATAAGTAGCGTATAT 60
H210-S1_csep1C     ATGAAAAAGCAAATTTTAGCTTCAGTCTTAGCCAGCGTTTTAGCCACAAGTAGCGTATAT 60
***** *  ***  *  *  *  *  *  *  *  *

```

|                   | <b>A</b>    | <b>B</b>                                             |     |
|-------------------|-------------|------------------------------------------------------|-----|
| P2CD04_csep1P     | GCTTGGGGC   | ---TTTGGAGGAAGCAGTAAAGAAAAGCCAAATTATGATTATAGCGCTGAT  | 117 |
| P13UCO-S3_csep1P  | GCTTGGGGC   | ---TTTGGAGGAAGTAGTAAAGAGAAAACCAAATTATGATTATAGCGCTGAT | 117 |
| P26UCO-S1_csep1C  | GCTTGGGGC   | ---TTT---GGAGTAGTAGAGAAAAGCCAAATTATGATTATAGCGCTGAT   | 114 |
| P2CD04_csep1C     | GCTTGGGGC   | ---TTT---GGAAGTAGTAGAGAAAAGCCAAATTATGATTATAGTGGGGAG  | 114 |
| P20CDO-S2_csep1P  | GCTTGGGGT   | ---TTT---GGAAGTAGTAAAGAAAAACCAAATTACGATTATAGTGGGGAG  | 114 |
| P20CDO-S3_csep1P  | GCTTGGGGT   | ---TTT---GGAAGTAGTAAAGAAAAACCAAATTACGATTATAGTGGGGAG  | 114 |
| P16UCO-S2_csep1C  | GCTTGGAGTTG | TTT---GGCGACGATAGAGAAAAGCCAAATTATGATTATAGTGGGGAG     | 117 |
| H110-S2_csep1C    | GCTTGGGGC   | ---TTT---GGGAGTAGCAAAGAAAACCAAATTATGATTATAGTGGGGAT   | 114 |
| P11CDO-S1_csep1C  | GCTTGGGGC   | ---TTT---GGGAGTAGCAAAGAAAACCAAATTATGATTATAGTGGGGAT   | 114 |
| P7UCO-S2_csep1C   | GCTTGGGGC   | ---TTT---GGGAGTAGCAAAGAAAAGCCAAATTATGATTATAGTGGGGAT  | 114 |
| H90-S1_csep1C     | GCTTGGGGC   | ---TTT---GGGAGTAGCAAAGAAAAGCCAAATTATGATTATAGTGGGGAT  | 114 |
| H200-S1_csep1C    | GCTTGGGGC   | ---TTTGGAGGAAGTAGTAAAGAAAAGCCAAATTATGATTATAGTGGCGAA  | 117 |
| P18CDO-S1_csep1C  | GCTTGGGGC   | ---TTT---GGAAGTAGTAGAGAAAAGCCAAATTATGATTATAGCGCTGAT  | 114 |
| H90-S2_csep1C     | GCCTGGAGTTG | TTT---GGCGGAGAAAAGAAAAGCCAAATTATGATTATAGCGCTGAT      | 117 |
| P13UCO-S1_csep1C  | GCTTGGGGC   | ---TTT---GGGAGTAGTAGAGAAAAGCCAAATTATGATTATAGCGCCGAT  | 114 |
| P27CDO-S1_csep1C  | GCTTGGGGC   | ---TTT---GGGAGTAGTAGAGAAAAGCCAAATTATGATTATAGCGCCGAT  | 114 |
| H290-S1_csep1C    | GCTTGGGGC   | ---TTT---GGGAGTAGTAGAGAAAAGCCAAATTATGATTATAGCGCCGAT  | 114 |
| P2CD03_csep1C     | GCTTGGGGC   | ---TTT---GGGAGTAGCAAAGAAAAGCCAAATTATGATTATAGTGGGGAG  | 114 |
| P2CDO-S6_csep1C   | GCTTGGGGC   | ---TTT---GGGAGTAGCAAAGAAAAGCCAAATTATGATTATAGTGGGGAG  | 114 |
| P1CDO3_csep1C     | GCTTGGAGTTG | TTT---GGCGCGATAGAGAAAAGCCAAATTATGATTATAGTGGGGAG      | 117 |
| P20CDO-S1_csep1C  | GCTTGGGGC   | ---TTT---GGGAGTAGTAGAGAAAAGCCAAATTATGATTATAGTGGGGAG  | 114 |
| P20CDO-S3_csep1C  | GCTTGGGGC   | ---TTT---GGGAGTAGTAGAGAAAAGCCAAATTATGATTATAGTGGGGAG  | 114 |
| H301_csep1C       | GCTTGGGGC   | ---TTTGGAGGAAGTAGTAAAGAGAAAACCAAATTATGATTATAGTGGGGAG | 117 |
| P11CDO-S1_csep1C2 | GCTTGGGGC   | ---TTTGGAGGAAGTAGTAAAGAAAAGCCAAATTATGATTATAGTGGAGAG  | 117 |
| P21CDO-S2_csep1C  | GCTTGGGGC   | ---TTT---GGAAGTAGTAGAGAAAAGCCAAATTATGATTATAGTGGGGAG  | 114 |
| H210-S1_csep1C    | GCTTGGGGC   | ---TTTGGAGGAAGTAGTAGAGAAAAGCCAAATTATGATTATAGTGGGGAG  | 117 |

\*\* \*\*\* \* \*\*\* \*\* \* \*\*\* \* \* \* \* \* \* \* \* \* \*

Supplementary Figure S3

|                   |                                                              |       |                             |     |
|-------------------|--------------------------------------------------------------|-------|-----------------------------|-----|
| P2CD04_csep1P     | AAAAAGCTTATAGAAATAAATACT                                     | ----- | AGACCAATTAGCACTGACAATGCAAAA | 168 |
| P13UCO-S3_csep1P  | AAAAAGCTTATAGAAATAAATACT                                     | ----- | AGGCCAATTAGCACTGACAATGCAAAA | 168 |
| P26UCO-S1_csep1C  | AAAAAGCTTATAGAAATAAATACT                                     | ----- | AGACCGATTAGCACTGATAATGCGAAA | 165 |
| P2CD04_csep1C     | AAAGAATTTATTCAGAAAAATACT                                     | ----- | AAAGAAATTGGCGGTGACAATGCTAAA | 165 |
| P20CDO-S2_csep1P  | AAAGAATTTATTCAGAAAAATACT                                     | ----- | AAAGAAATTGGCGGTGACAATGCTAAA | 165 |
| P20CDO-S3_csep1P  | AAAGAATTTATTCAGAAAAATACT                                     | ----- | AAAGAAATTGGCGGTGACAATGCTAAA | 165 |
| P16UCO-S2_csep1C  | AAAGAATTCATTCAGAAAAATACT                                     | ----- | CAAAAGCTTGGGACTAATGATGCAAAA | 168 |
| H110-S2_csep1C    | AAACAGTTTATAGAAACTAACACG                                     | ----- | AAAAAATAGACACAGATAGGGCAAAA  | 165 |
| P11CDO-S1_csep1C  | AAACAGTTTATAGAAACTAACACG                                     | ----- | AAAAAATAGACACAGATAGGGCAAAA  | 165 |
| P7UCO-S2_csep1C   | AAACAGTTTATAGAAACTAACACG                                     | ----- | AAAAAATAGACACAGATAGGGCAAAA  | 165 |
| H90-S1_csep1C     | AAACAGTTTATAGAAACTAACACG                                     | ----- | AAAAAATAGACACAGATAGGGCAAAA  | 165 |
| H200-S1_csep1C    | AAAGAATTTATTCAGAAAAATACT                                     | ----- | CAAAAGCTTGGGACTAATGACGCAAAA | 168 |
| P18CDO-S1_csep1C  | AAAAAGCTTATAGAAACCAATACA                                     | ----- | CAAAAAATTGGCACTGAAAAAGCAAAA | 165 |
| H90-S2_csep1C     | AAAAAGCTTATAGAAACCAATACA                                     | ----- | CAAAAAATTGGCACTGAAAAAGCAAAA | 168 |
| P13UCO-S1_csep1C  | AAAAAGCTTATAGAAACCAATACA                                     | ----- | CAAAAAATTGGCACTGAAAAAGCAAAA | 165 |
| P27CDO-S1_csep1C  | AAAAAGCTTATAGAAACCAATACA                                     | ----- | CAAAAAATTGGCACTGAAAAAGCAAAA | 165 |
| H290-S1_csep1C    | AAAAAGCTTATAGAAACCAATACA                                     | ----- | CAAAAAATTGGCACTGAAAAAGCAAAA | 165 |
| P2CD03_csep1C     | AAAGAGCTAATGTCATTAAGTTCTTTCTCAGACAAAGATCTGCGAATTGATGATGCAAAA |       |                             | 174 |
| P2CDO-S6_csep1C   | AAAGAGCTAATGTCATTAAGTTCTTTCTCAGACAAAGATCTGCGAATTGATGATGCAAAA |       |                             | 174 |
| P1CDO3_csep1C     | AAAGAGCTAATGTCATTAAGTTCTTTCTCAGACAAAGATCTGCGAATTGATGATGCAAAA |       |                             | 177 |
| P20CDO-S1_csep1C  | AAAGAGCTAATGTCATTAAGTTCTTTCTCAGACAAAGATCTGCGAATTGATGATGCAAAA |       |                             | 174 |
| P20CDO-S3_csep1C  | AAAGAGCTAATGTCATTAAGTTCTTTCTCAGACAAAGATCTGCGAATTGATGATGCAAAA |       |                             | 174 |
| H301_csep1C       | AAAGAGCTAATGTCATTAAGTTCTTTCTCGGACAAAGATCTGCGAATTGATGATGCAAAA |       |                             | 177 |
| P11CDO-S1_csep1C2 | AAAGAGCTAATGTCATTAAGTTCTTTCTCAGGAAATAATCTACGAATTGATGATGCAAAA |       |                             | 177 |
| P21CDO-S2_csep1C  | AAAGAGCTAATGTCATTAAGTTCTTTCTCAGACAAAGATCTGCGAATTGATGATGCAAAA |       |                             | 174 |
| H210-S1_csep1C    | AAAGAGCTAATGTCATTAAGTTCTTTCTCAGACAAAGATCTGCGAATTGATGATGCAAAA |       |                             | 177 |
|                   | *** * * ** * *                                               |       |                             |     |

|                   |                                                               |     |
|-------------------|---------------------------------------------------------------|-----|
| P2CD04_csep1P     | TATTGGTGTTTTGACAAAGGTAATGATTTAGGTTGTCTTTTCGCTAGAAAACTAGAAGCT  | 228 |
| P13UCO-S3_csep1P  | TATTGGTGTTTTGACAAAGGTAATGATTTAGGTTGTCTTTTCGCTAGAAAACTAGAAGCT  | 228 |
| P26UCO-S1_csep1C  | TATTGGTGTTTTGATAAAGGCAATGATTTAGGTTGTCTTTTCGCTAGAAAAATTAGAAGCT | 225 |
| P2CD04_csep1C     | TACTGGTGCTTTGATAAAGGCAATGATCTAGGTTGTCTTTTCGCTAGAAAAATTAGAAGCT | 225 |
| P20CDO-S2_csep1P  | TACTGGTGCTTTGATAAAGGCAATGATCTAGGTTGTCTTTTCGCTAGAAAAATTAGAAGCT | 225 |
| P20CDO-S3_csep1P  | TACTGGTGCTTTGATAAAGGCAATGATCTAGGTTGTCTTTTCGCTAGAAAAATTAGAAGCT | 225 |
| P16UCO-S2_csep1C  | AGATGGTGCTTTGATAAAGGCAACGATCTAGGTTGTCTTTGGCTAGAAAAATTAGAGGCT  | 228 |
| H110-S2_csep1C    | TATTGGTGTTTATAGTCAAGGTAATGATCTAGGCTGCCTAGCACTAGAAAAACGAGAGGCT | 225 |
| P11CDO-S1_csep1C  | TATTGGTGTTTATAGTCAAGGTAATGATCTAGGCTGCCTAGCACTAGAAAAACGAGAGGCT | 225 |
| P7UCO-S2_csep1C   | TATTGGTGTTTATAGTCAAGGTAATGATCTAGGCTGCCTAGCACTAGAAAAACGAGAGGCT | 225 |
| H90-S1_csep1C     | TATTGGTGTTTATAGTCAAGGTAATGATCTAGGCTGCCTAGCACTAGAAAAACGAGAGGCT | 225 |
| H200-S1_csep1C    | AGATGGTGCTTTGATAAAGGTAACGATCTAGGTTGTCTTTGGCTAGAAAAATTAGAGGCT  | 228 |
| P18CDO-S1_csep1C  | TATTGGTGCTTAGATCAAGGCAACGACCTAGGTTGTTTAGCATTAGAAAAATTAGAAGCT  | 225 |
| H90-S2_csep1C     | TATTGGTGCTTAGATCAAGGTAACGATCTAGGTTGTTTAGCATTAGAAAAATTAGAAGCA  | 228 |
| P13UCO-S1_csep1C  | TATTGGTGCTTAGATCAAGGTAACGATCTAGGTTGTTTAGCATTAGAAAAATTAGAAGCA  | 225 |
| P27CDO-S1_csep1C  | TATTGGTGCTTAGATCAAGGTAACGATCTAGGTTGTTTAGCATTAGAAAAATTAGAAGCA  | 225 |
| H290-S1_csep1C    | TATTGGTGCTTAGATCAAGGTAACGATCTAGGTTGTTTAGCATTAGAAAAATTAGAAGCA  | 225 |
| P2CD03_csep1C     | TATTGGTGCTTTGATCAAGGCAATGATCTAGGTTGTATTTGGCTAGACAAACTAGAAGCT  | 234 |
| P2CDO-S6_csep1C   | TATTGGTGCTTTGATCAAGGCAATGATCTAGGTTGTATTTGGCTAGACAAACTAGAAGCT  | 234 |
| P1CDO3_csep1C     | TATTGGTGCTTTGATCAAGGCAATGATCTAGGTTGTATTTGGCTAGACAAACTAGAAGCT  | 237 |
| P20CDO-S1_csep1C  | TATTGGTGCTTTGATCAAGGCAATGATCTAGGTTGTATTTGGCTAGACAAACTAGAAGCT  | 234 |
| P20CDO-S3_csep1C  | TATTGGTGCTTTGATCAAGGCAATGATCTAGGTTGTATTTGGCTAGACAAACTAGAAGCT  | 234 |
| H301_csep1C       | TATTGGTGCTTTGATCAAGGCAATGATCTGGGTTGCATTTGGCTAGACAAACTAGAAGCT  | 237 |
| P11CDO-S1_csep1C2 | TATTGGTGTTTATAGTCAAGGTAATGATCTAGGTTGTATTTGGCTAGATAAGCTAGAGGCC | 237 |
| P21CDO-S2_csep1C  | TATTGGTGCTTTGATCAAGGCAATGATCTAGGTTGTATTTGGCTAGACAAACTAGAAGCT  | 234 |
| H210-S1_csep1C    | TATTGGTGCTTTGATCAAGGCAATGATCTAGGTTGTATTTGGCTAGACAAACTAGAAGCT  | 237 |
|                   | ***** * ** * ** * * * * * * * * * * * * * * * * * * * * *     |     |

Supplementary Figure S3

|                   |                                                                                                   |     |
|-------------------|---------------------------------------------------------------------------------------------------|-----|
| P2CD04_csep1P     | TTAGAGAGTAAAGACCTTAAAAAGGTTGTAATAATCTACGAAAAAACTATCCCAGAATAC                                      | 288 |
| P13UCO-S3_csep1P  | TTAGAGAGCAAAGACCTTAAAAAGGTTGTAATAATCTATGAAAAAACCATCCAGAATAC                                       | 288 |
| P26UCO-S1_csep1C  | TTAGAGAGTAAAGACCTTAAAAAGGTTGTAATAATCTACGAAAAAACCATCCAGAATAC                                       | 285 |
| P2CD04_csep1C     | TTAGAGAGTAAAGACCTTAAAAAGGTTATAATAATCTACGAAAAAACCATCCAGAATAC                                       | 285 |
| P20CDO-S2_csep1P  | TTAGAGAGTAAAGACCTTAAAAAGGTTATAATAATCTACGAAAAAACCATCCAGAATAC                                       | 285 |
| P20CDO-S3_csep1P  | TTAGAGAGTAAAGACCTTAAAAAGGTTATAATAATCTACGAAAAAACCATCCAGAATAC                                       | 285 |
| P16UCO-S2_csep1C  | ATGGAAAGCAAAGATCTTAAAAAGGTTGTAATAATTTTATGAGAAGACTATCCCAGAGTAT                                     | 288 |
| H110-S2_csep1C    | TTAGCCAATAAAGACCTTAAAAAGTAGTGAATTTTATGAAAAAACTATCCAGAATAC                                         | 285 |
| P11CDO-S1_csep1C  | TTAGCCAATAAAGACCTTAAAAAGTAGTGAATTTTATGAAAAAACTATCCAGAATAC                                         | 285 |
| P7UCO-S2_csep1C   | TTAGCCAATAAAGACCTTAAAAAGTAGTGAATTTTATGAAAAAACAGTGCCAGAATAC                                        | 285 |
| H90-S1_csep1C     | TTAGCCAATAAAGACCTTAAAAAGTAGTGAATTTTATGAAAAAACAGTGCCAGAATAC                                        | 285 |
| H200-S1_csep1C    | ATGGAAAGCAAAGATCTTAAAAAGGTTGTAATAATTTTATGAGAAGACTATCCAGAATAC                                      | 288 |
| P18CDO-S1_csep1C  | TTAAAGGGTAAAGATCTCAAAAAAGTTATAATAATTTATGAAAAAACTATCCAGAGTAT                                       | 285 |
| H90-S2_csep1C     | TTAAAGAGTAAAGATCTTAAAAAGGTTATAATAATTTATGAAAAAACTATCCCTGAGTAT                                      | 288 |
| P13UCO-S1_csep1C  | TTAAAGAGTAAAGATCTTAAAAAGGTTATAATAATTTATGAAAAAACTATCCAGAGTAT                                       | 285 |
| P27CDO-S1_csep1C  | TTAAAGAGTAAAGATCTTAAAAAGGTTATAATAATTTATGAAAAAACTATCCAGAGTAT                                       | 285 |
| H290-S1_csep1C    | TTAAAGAGTAAAGATCTTAAAAAGGTTATAATAATTTATGAAAAAACTATCCAGAGTAT                                       | 285 |
| P2CD03_csep1C     | TTAGCTAGTAAAGACATTAAGAAAAGTAGCAAAATTTTATGAAAAAACAGTGCCAGAATAT                                     | 294 |
| P2CDO-S6_csep1C   | TTAGCTAGTAAAGACATTAAGAAAAGTAGCAAAATTTTATGAAAAAACAGTGCCAGAATAT                                     | 294 |
| P1CDO3_csep1C     | TTAGCTAGTAAAGACATTAAGAAAAGTAGCAAAATTTTATGAAAAAACAGTGCCAGAATAT                                     | 297 |
| P20CDO-S1_csep1C  | TTAGCTAGTAAAGACATTAAGAAAAGTAGCAAAATTTTACGAAAAAACAGTGCCAGAATAT                                     | 294 |
| P20CDO-S3_csep1C  | TTAGCTAGTAAAGACATTAAGAAAAGTAGCAAAATTTTACGAAAAAACAGTGCCAGAATAT                                     | 294 |
| H301_csep1C       | TTAGCTAGTAAAGACATTAAGAAAAGTAACAAAATTTTATGAAAAAACAGTACCAGAATAT                                     | 297 |
| P11CDO-S1_csep1C2 | TTAGCTAGTAAAGACATTAAGAAAAGTAGCAAAATTTCTATGAAAAAACAGTGCCAGAATAT                                    | 297 |
| P21CDO-S2_csep1C  | TTAGCTAGTAAAGACATTAAGAAAAGTAACAAAATTTTATGAAAAAACAGTGCCAGAATAT                                     | 294 |
| H210-S1_csep1C    | TTAGCTAGTAAAGACATTAAGAAAAGTAGCAAAATTTTATGAAAAAACAGTGCCAGAATAT                                     | 297 |
|                   | *                   *****   *   *   *   *                   *   *   *   *   *   *   *   *   *   * |     |
| P2CD04_csep1P     | TGCTACGATAAAAAATTTGCTCCAGCTTGCAATATACCAGCCATTGATTTAATTCAACAA                                      | 348 |
| P13UCO-S3_csep1P  | TGCTACGATAAAAAATTTGCTCCAGCGTGCAATATACCAGCCATTGATTTAATTCAACAA                                      | 348 |
| P26UCO-S1_csep1C  | TGCTACGATAAAAAATTTGCTCCAGCATGCAATATACCAGCTATTGATTTAATTAAATAT                                      | 345 |
| P2CD04_csep1C     | TGCTACGATAAAAAATTTGCTCCAGCGTGCAATATACCAGCTATTGATTTAATTAAATAT                                      | 345 |
| P20CDO-S2_csep1P  | TGCTACGATAAAAAATTTGCTCCAGCGTGCAATATACCAGCTATTGATTTAATTAAATAT                                      | 345 |
| P20CDO-S3_csep1P  | TGCTACGATAAAAAATTTGCTCCAGCGTGCAATATACCAGCTATTGATTTAATTAAATAT                                      | 345 |
| P16UCO-S2_csep1C  | TGTTATGATAAAAAATTTGCTCCAGCTTGCAATATACCAGCTCTTGATTTGATTTAAAGAA                                     | 348 |
| H110-S2_csep1C    | TGCTATGAGAAAAAATTTGCTCCAGCGTGCAATATACCAGCTCTTGATTTGATTTTATAC                                      | 345 |
| P11CDO-S1_csep1C  | TGCTATGAGAAAAAATTTGCTCCAGCGTGCAATATACCAGCTCTTGATTTGATTTTATAC                                      | 345 |
| P7UCO-S2_csep1C   | TGCTATGAGAAAAAATTTGCTCCAGCGTGCAATATACCAGCTCTTGATTTGATTTTATAC                                      | 345 |
| H90-S1_csep1C     | TGCTATGAGAAAAAATTTGCTCCAGCGTGCAATATACCAGCTCTTGATTTGATTTTATAC                                      | 345 |
| H200-S1_csep1C    | TGTTATGATAAAAAATTTGCCCCAGCTTGCAATATACCAGCTCTTGATTTGATAAAATGG                                      | 348 |
| P18CDO-S1_csep1C  | TGTTATGATAAAAAATTTGCTCCAGCATGCAATATACCAGCTCATGATTTGATAGAAATGG                                     | 345 |
| H90-S2_csep1C     | TGTTATGATAAAAAATTTGCTCCAGCATGCAATATACCAGCTCTTGATTTGATAAAATGG                                      | 348 |
| P13UCO-S1_csep1C  | TGTTATGATAAAAAATTTGCTCCAGCATGCAATATACCAGCTCTTGATTTGATAAAATGG                                      | 345 |
| P27CDO-S1_csep1C  | TGTTATGATAAAAAATTTGCTCCAGCATGCAATATACCAGCTCTTGATTTGATAAAATGG                                      | 345 |
| H290-S1_csep1C    | TGTTATGATAAAAAATTTGCTCCAGCATGCAATATACCAGCTCTTGATTTGATAAAATGG                                      | 345 |
| P2CD03_csep1C     | TGTTATGACAAAAAATTTGCTCCAGCATGCAATATACCTGCTCTTGATTTGATAAAATGG                                      | 354 |
| P2CDO-S6_csep1C   | TGTTATGACAAAAAATTTGCTCCAGCATGCAATATACCTGCTCTTGATTTGATAAAATGG                                      | 354 |
| P1CDO3_csep1C     | TGTTATGACAAAAAATTTGCTCCAGCATGCAATATACCAGCTCGTGATTTGATAAAATGG                                      | 357 |
| P20CDO-S1_csep1C  | TGTTATGACAAAAAATTTGCTCCAGCATGCAATATACCAGCTCTTGATTTGATAAAATGG                                      | 354 |
| P20CDO-S3_csep1C  | TGTTATGACAAAAAATTTGCTCCAGCATGCAATATACCAGCTCTTGATTTGATAAAATGG                                      | 354 |
| H301_csep1C       | TGTTATGACAAAAAATTCGCTCCAGCTTGCAATATACCAGCTCTTGATTTGATAAAATGG                                      | 357 |
| P11CDO-S1_csep1C2 | TGTTATGATAAAAAATTCGCTCCAGCTTGCAATATACCAGCTCATGATTTGATAGAAATGG                                     | 357 |
| P21CDO-S2_csep1C  | TGTTATGATAAAAAATTCGCTCCAGCTTGCAATATACCAGCTCATGATTTGATAGAAATGG                                     | 354 |
| H210-S1_csep1C    | TGTTATGACAAAAAATTCGCTCCAGCTTGCAATATACCAGCTCGTGATTTGATAGAAATGG                                     | 357 |
|                   | **   *   *   *   *****   *   *   *****   *****   *****   *   *   *****   **                       |     |

Supplementary Figure S3

|                   | <b>D</b>                                                       |     |
|-------------------|----------------------------------------------------------------|-----|
| P2CDO4_csep1P     | AAATTATCATACTATGTTAGAAATGATATTGATAATAAAACTATAAAAACTTTTTATTCT   | 408 |
| P13UCO-S3_csep1P  | AAATTATCATACTATGTTAGAAATGATATTGATAATAAAACTATAAAAACTTTTTATTCT   | 408 |
| P26UCO-S1_csep1C  | AAAATAGTTTATTTTTCAAAAAGAAGTGATGATTACACAAAAATAAAAAATCAAGAATTT   | 405 |
| P2CDO4_csep1C     | AAAATAGTTTATTTTTCAAAAAGAAGTGATGATTACACAAAAATAAAAAATCAAGAATTT   | 405 |
| P20CDO-S2_csep1P  | AAAATAGTTTATTTTTCAAAAAGAAGTGATGATTACACAAAAATAAAAAATCAAGAATTT   | 405 |
| P20CDO-S3_csep1P  | AAAATAGTTTATTTTTCAAAAAGAAGTGATGATTACACAAAAATAAAAAATCAAGAATTT   | 405 |
| P16UCO-S2_csep1C  | AAGGTAGTTTATTTTTGCAAAAGAAAAGTGGTGATTATGCAAAAGTAGAAGCCATAGATTCT | 408 |
| H110-S2_csep1C    | AAAATAATCTATTTTTGCACATAAAAAGCGATGATCAAGCTAAAACCGATGCCATAGATTCT | 405 |
| P11CDO-S1_csep1C  | AAAATAATCTATTTTTGCACATAAAAAGCGATGATCAAGCTAAAACCGATGCCATAGATTCT | 405 |
| P7UCO-S2_csep1C   | AAAATAATCTATTTTTGCACATAAAAAGCGATGATCAAGCTAAAACCGATGCCATAGATTCT | 405 |
| H90-S1_csep1C     | AAAATAATCTATTTTTGCACATAAAAAGCGATGATCAAGCTAAAACCGATGCCATAGATTCT | 405 |
| H200-S1_csep1C    | AAAATAGTTTATTTTTGCAAAAAAAG-----ATAAAAAATACCAAATCTATTTATTCT     | 399 |
| P18CDO-S1_csep1C  | AAAATAGTTTATTTTTGCAAAAAAAGTGATGATTATGCAAAAGAAAAGCCATCGAGTCT    | 405 |
| H90-S2_csep1C     | AAAATAGTTTATTTTTGCAAGAAAAG-----ATGGAAATACTAAATCTATTTATTCT      | 399 |
| P13UCO-S1_csep1C  | AAAATAGTTTATTTTTGCGAAGAAAAG-----ATGGAAATACTAAATCTATTTATTCT     | 396 |
| P27CDO-S1_csep1C  | AAAATAGTTTATTTTTGCGAAGAAAAG-----ATGGAAATACTAAATCTATTTATTCT     | 396 |
| H290-S1_csep1C    | AAAATAGTTTATTTTTGCGAAGAAAAG-----ATGGAAATACTAAATCTATTTATTCT     | 396 |
| P2CDO3_csep1C     | AAAATAGTTTATTTTTGCAAAAAAAG-----ATAAAAAATACCAAATCTATTTATTCT     | 405 |
| P2CDO-S6_csep1C   | AAAATAGTTTATTTTTGCAAAAAAAG-----ATAAAAAATACCAAATCTATTTATTCT     | 405 |
| P1CDO3_csep1C     | AAAATAGTTTATTTTTGCAAGAAAAG-----ATGGAGATACTAAATCTATTTATTCT      | 408 |
| P20CDO-S1_csep1C  | AAAATAGTTTATTTTTGCAAAAAAAG-----ATAAAAAATACCAAATCTATTTATTCT     | 405 |
| P20CDO-S3_csep1C  | AAAATAGTTTATTTTTGCAAAAAAAG-----ATAAAAAATACCAAATCTATTTATTCT     | 405 |
| H301_csep1C       | AAAATAGTTTATTTTTGCAAGAAAAG-----ATGGAGATACTAAATCTATTTATTCT      | 408 |
| P11CDO-S1_csep1C2 | AAAATTATATATTTTTGCTAAAAAAA-----ATCAAATACTAGCACTATAAACGCA       | 408 |
| P21CDO-S2_csep1C  | AAAATAGTTTATTTTTGCAAAAAAAG-----ATAAAAAATACCAAATCTATTTATTCT     | 405 |
| H210-S1_csep1C    | AAAATAGTTTATTTTTGCAAAAAAAG-----ATAAAAAATACCAAATCTATTTATTCT     | 408 |
|                   | ** * ** * *                                                    | *   |

|                   | <b>E</b>                                                      |     |
|-------------------|---------------------------------------------------------------|-----|
| P2CDO4_csep1P     | GATTATGCAAAAGCCCTTTCTG---AGTCAAAAGCAGATGTAAAAATGCTTGAATATGGC  | 465 |
| P13UCO-S3_csep1P  | GACTATGCAAAAGCACTTTCTG---AGTCAAAAGCAGATGTAAAAATGCTTGAATATGGT  | 465 |
| P26UCO-S1_csep1C  | GATTATGCAAAAGCCTTTCTG---AGTCAAAAGCAGACGTAAAAATGCTTGAATATGGC   | 462 |
| P2CDO4_csep1C     | GATTATGCAAAAGCCCTTTCTG---AGTCAAAAGCAGATGTAAAAATGCTTGAATATGGC  | 462 |
| P20CDO-S2_csep1P  | GATTATGCAAAAGCCCTTTCTG---AGTCAAAAGCAGACGTAAAAATGCTTGAATATGGC  | 462 |
| P20CDO-S3_csep1P  | GATTATGCAAAAGCCCTTTCTG---AGTCAAAAGCAGACGTAAAAATGCTTGAATATGGC  | 462 |
| P16UCO-S2_csep1C  | GATTATGCAAAAGCTCTTTCTG---AGTCAAAAGCGGACGTAAAAATGCTTGAATACGGC  | 465 |
| H110-S2_csep1C    | GATTATGCAAAAGCTCTTTCTG---AGTCAAAAGCGGACGTAAAAATGCTTGAATACGGC  | 462 |
| P11CDO-S1_csep1C  | GATTACGCAAAAGCTCTTTCTG---AGTCAAAAGCGGACGTAAAAATGCTTGAATACGGC  | 462 |
| P7UCO-S2_csep1C   | GATTATGCAAAAGCTCTTTCTG---AGTCAAAAGCGGACGTAAAAATGCTTGAATACGGC  | 462 |
| H90-S1_csep1C     | GATTATGCAAAAGCTCTTTCTG---AGTCAAAAGCGGACGTAAAAATGCTTGAATACGGC  | 462 |
| H200-S1_csep1C    | GACTATGCAAAAGCACTTTCTG---AGTCAAAAGCAGATGTAAAAATGCTTGAATATGGT  | 456 |
| P18CDO-S1_csep1C  | GACTATGCAAAAGCACTTTCTG---AGTCAAAAGCAGATGTAAAAATGCTTGAATATGGC  | 462 |
| H90-S2_csep1C     | GACTATGCAAAAGCACTTTCTG---AGTCAAAAGCAGATGTAAAAATGCTTGAATATGGC  | 456 |
| P13UCO-S1_csep1C  | GACTATGCAAAAGCACTTTCTG---AGTCAAAAGCAGATGTAAAAATGCTTGAATATGGT  | 453 |
| P27CDO-S1_csep1C  | GACTATGCAAAAGCACTTTCTG---AGTCAAAAGCAGATGTAAAAATGCTTGAATATGGT  | 453 |
| H290-S1_csep1C    | GACTATGCAAAAGCACTTTCTG---AGTCAAAAGCAGATGTAAAAATGCTTGAATATGGT  | 453 |
| P2CDO3_csep1C     | GACTATGCAAAAGCACTTTCTG---AGTCAAAAGCAGATGTAAAAATGCTTGAATATGGC  | 462 |
| P2CDO-S6_csep1C   | GACTATGCAAAAGCACTTTCTG---AGTCAAAAGCAGATGTAAAAATGCTTGAATATGGC  | 462 |
| P1CDO3_csep1C     | GACTATGCAAAAGCACTTTCTG---AGTCAAAAGCAGATGTAAAAATGCTTGAATATGGC  | 465 |
| P20CDO-S1_csep1C  | GACTATGCAAAAGCACTTTCTG---AGTCAAAAGCAGATGTAAAAATGCTTGAATATGGC  | 462 |
| P20CDO-S3_csep1C  | GACTATGCAAAAGCACTTTCTG---AGTCAAAAGCAGATGTAAAAATGCTTGAATATGGC  | 462 |
| H301_csep1C       | GACTATGCAAAAGCACTTTCTG---AGTCAAAAGCAGATGTAAAAATGCTTGAATATGGT  | 465 |
| P11CDO-S1_csep1C2 | GATTTTGCAAAAATGATTACTGCCAAATCAGGAGCAGAGCTTAAAAATGCTTGAATATGGT | 468 |
| P21CDO-S2_csep1C  | GACTATGCAAAAGCACTTTCTG---AGTCAAAAGCGGACGTAAAAATGCTTGAATATGGC  | 462 |
| H210-S1_csep1C    | GACTATGCAAAAGCACTTTCTG---AGTCAAAAGCAGATGTAAAAATGCTTGAATATGGC  | 465 |
|                   | ** * ***** ** *** * *** ** * ***** ** **                      |     |



Supplementary Figure S3

|                   |                                                                |     |
|-------------------|----------------------------------------------------------------|-----|
| P2CD04_csep1P     | AATTCAGTTCTTTATGACTATAAGCACATGCGATATATCCACGGTGGTTATTCAAGCTGG   | 645 |
| P13UCO-S3_csep1P  | AATTCTGTTCTTTATGACTATCAACACATGAGATATATTTATAAAGATGCCTCTGCGTGG   | 645 |
| P26UCO-S1_csep1C  | AATTCGGTTCTTTATGATTATAAGCACATGCGATATATCCACGGTGGTTATTCAAGCTGG   | 642 |
| P2CD04_csep1C     | AATTCGGTTCTTTATGATTATAAGCACATGCGATATATCCACGGTGGTTATTCAAGCTGG   | 642 |
| P20CDO-S2_csep1P  | AATTCGGTTCTTTATGATTATAAGCACATGCGATATATCCACGGTGGTTATTCAAGCTGG   | 642 |
| P20CDO-S3_csep1P  | AATTCGGTTCTTTATGATTATAAGCACATGCGATATATCCACGGTGGTTATTCAAGCTGG   | 642 |
| P16UCO-S2_csep1C  | AATTCAGTCATTTATGATTATCATCATAGTCGATTTGCCTATGGAAGAGCTTCTGGATGG   | 645 |
| H110-S2_csep1C    | AATTCAGTCATTTATGATTATCATCATAGTCGATTTGCCTATGGAAGAGCTTCTGGATGG   | 642 |
| P11CDO-S1_csep1C  | AATTCAGTCATTTATGATTATCATCATAGTCGATTTGCCTATGGAAGAGCTTCTGGATGG   | 642 |
| P7UCO-S2_csep1C   | AATTCAGTCATTTATGATTATCATCATAGTCGATTTGCCTATGGAAGAGCTTCTGGATGG   | 642 |
| H90-S1_csep1C     | AATTCAGTCATTTATGATTATCATCATAGTCGATTTGCCTATGGAAGAGCTTCTGGATGG   | 642 |
| H200-S1_csep1C    | AATTCGGTCCCTTTATGATTATCAGCACATGAGATATATAAAATAGTAATAACTCTGCATGG | 636 |
| P18CDO-S1_csep1C  | AATTCGTGTTCTTTATGACTATCAGCACATGAGATATATAAAATAGCAATAACTCTGCATGG | 642 |
| H90-S2_csep1C     | AATTCAGTTCTTTACGATTATCAACATAGACGATACATAAAATAGGAATAACTCTGCATGG  | 636 |
| P13UCO-S1_csep1C  | AATTCTGTTCTTTACGATTATCAACATAGACGATACATAAAATAGGAATAACTCTGCATGG  | 633 |
| P27CDO-S1_csep1C  | AATTCTGTTCTTTACGATTATCAACATAGACGATACATAAAATAGGAATAACTCTGCATGG  | 633 |
| H290-S1_csep1C    | AATTCTGTTCTTTACGATTATCAACATAGACGATACATAAAATAGGAATAACTCTGCATGG  | 633 |
| P2CD03_csep1C     | AATTCTGTTCTTTATGATTATAAACACATGCGATATATCCACGGTGATTATTCAAGCTGG   | 642 |
| P2CDO-S6_csep1C   | AATTCTGTTCTTTATGATTATAAACACATGCGATATATCCACGGTGATTATTCAAGCTGG   | 642 |
| P1CDO3_csep1C     | GATTCGGTTCTTTATGATTATAAGCACATGCGATATATCCACGGTGGTTATTCAAGCTGC   | 645 |
| P20CDO-S1_csep1C  | AATTCAGTTCTTTATGATTATCAACACATGAGATATATCTATAAAGATGCTTCTGCATGG   | 642 |
| P20CDO-S3_csep1C  | AATTCAGTTCTTTATGATTATCAACACATGAGATATATCTATAAAGATGCTTCTGCATGG   | 642 |
| H301_csep1C       | AATTCTGTTCTTTATGACTATCAACACATGAGATATATTTATAAAGATGCCTCTGCGTGG   | 645 |
| P11CDO-S1_csep1C2 | GACTCTGTGTTATATGATAGTAATCAGATGAGATATATATATAAAAAATGCGTCAGGATGG  | 648 |
| P21CDO-S2_csep1C  | AATTCAGTTCTTTATGATTATCAACACATGAGATATATTTATAAAGACGCCACTGCGTGG   | 642 |
| H210-S1_csep1C    | AATTCTGTTCTTTATGACTATCAACACATAAGATATATTTATAAAGACGCCCTCTGCGTGG  | 645 |

\* \*\* \* \* \* \* \* \* \* \* \* \* \* \* \* \* \* \* \* \*

|                   |          |                   |     |
|-------------------|----------|-------------------|-----|
| P2CD04_csep1P     | TGGCTTTT | AGAAAAAATAAAATAA  | 669 |
| P13UCO-S3_csep1P  | AAGCTTTT | -----AATCAATTAA   | 663 |
| P26UCO-S1_csep1C  | TTGCTTTT | AGAAAAAGATAAAGTAA | 666 |
| P2CD04_csep1C     | TTGCTTTT | AGAAAAAGATAAAGTAA | 666 |
| P20CDO-S2_csep1P  | TTGCTTTT | AGAAAAAATAAAATAG  | 666 |
| P20CDO-S3_csep1P  | TTGCTTTT | AGAAAAAATAAAATAG  | 666 |
| P16UCO-S2_csep1C  | TGGTTTTT | -----GGACGATTGA   | 663 |
| H110-S2_csep1C    | TGGTTTTT | -----GGACGATTGA   | 660 |
| P11CDO-S1_csep1C  | TGGTTTTT | -----GGACGATTGA   | 660 |
| P7UCO-S2_csep1C   | TGGTTTTT | -----GGACGATTGA   | 660 |
| H90-S1_csep1C     | TGGTTTTT | -----GGACGATTGA   | 660 |
| H200-S1_csep1C    | TGGCTTTT | -----AGAAGATTAG   | 654 |
| P18CDO-S1_csep1C  | TGGCTTTT | -----GCTCTATTAA   | 660 |
| H90-S2_csep1C     | TGGCTTTT | -----AGAAGATTAA   | 654 |
| P13UCO-S1_csep1C  | TGGCTTTT | -----GCTCTATTAA   | 651 |
| P27CDO-S1_csep1C  | TGGCTTTT | -----GCTCTATTAA   | 651 |
| H290-S1_csep1C    | TGGCTTTT | -----GCTCTATTAA   | 651 |
| P2CD03_csep1C     | TGGCTTTT | AGAAAAAATAAAGTAA  | 666 |
| P2CDO-S6_csep1C   | TGGCTTTT | AGAAAAAATAAAGTAA  | 666 |
| P1CDO3_csep1C     | TTGCTTTT | AGAAAAAATAAAGTAA  | 669 |
| P20CDO-S1_csep1C  | TGGCTTTT | -----GCTCTATTAA   | 660 |
| P20CDO-S3_csep1C  | TGGCTTTT | -----GCTCTATTAA   | 660 |
| H301_csep1C       | AAGCTTTT | -----AATCAATTAA   | 663 |
| P11CDO-S1_csep1C2 | AGGAATTT | AGAGTTTCTTAAATAG  | 672 |
| P21CDO-S2_csep1C  | AAGCTTTT | -----GCTCTATTAA   | 660 |
| H210-S1_csep1C    | AAGCTTTT | -----AATCAATTAA   | 663 |

\* \*\*\* \* \*
