# Supplementary material for: Genomic analysis of oral Campylobacter concisus strains identified a potential bacterial molecular marker associated with active Crohn’s disease
Source: PubMed Central journal article supplement (PMC5893538; doi:10.1038/s41426-018-0065-6), 2018-04-11
Supplement: 41426_2018_65_MOESM6_ESM.pdf [file 41426_2018_65_MOESM6_ESM.pdf]

Supplementary Figure S4

P2CDO4\_Csep1P MKKQILASVLASVLATSSVYAWGFGSSKEKPNYDYSADKKLIEINT---RPISTDNAKY 57  
P13UCO-S3\_Csep1C MKKQILASVLASVLATSSVYAWGFGSSKEKPNYDYSADKKLIEINT---RPISTDNAKY 57  
P26UCO-S1\_Csep1C MKKQILASVLASVLATSSVYAWGF-GSSREKPNYDYSADKKLIEINT---RPISTDNAKY 56  
P2CDO4\_Csep1C MKKQILASVLASVLAISSVYAWGF-GSSREKPNYDYSGEKEFIQKNT---KEIGGDNAKY 56  
P20CDO-S2\_Csep1P MKKQILASVLASVLATSSVYAWGF-GSSKEKPNYDYSGEKEFIQKNT---KEIGGDNAKY 56  
P20CDO-S3\_Csep1P MKKQILASVLASVLATSSVYAWGF-GSSKEKPNYDYSGEKEFIQKNT---KEIGGDNAKY 56  
P16UCO-S2\_Csep1C MKKQILASVLV GALAVSSASAWSLFGDDREKPNYDYSGEKEFIQKNT---QKLGTDNAKR 57  
H110-S2\_Csep1C MKKQILASVLASVLATSSVYAWGF-GSSKEKPNYDYS GDKQFIETNT---KKIDTDRAKY 56  
P11CDO-S1\_Csep1C MKKQILASVLASVLATSSVYAWGF-GSSKEKPNYDYS GDKQFIETNT---KKIDTDRAKY 56  
P7UCO-S2\_Csep1C MKKQILASVLASALATSSVYAWGF-GSSKEKPNYDYS GDKQFIETNT---KKIDTDRAKY 56  
H90-S1\_Csep1C MKKQILASVLASALATSSVYAWGF-GSSKEKPNYDYS GDKQFIETNT---KKIDTDRAKY 56  
H200-S1\_Csep1C MKKQILASVLASVLATSSVYAWGFGSSKEKPNYDYSGEKEFIQKNT---QKLGTDNAKR 57  
P18CDO-S1\_Csep1C MKKQILASVLASVLATSSVYAWGF-GSSREKPNYDYSADKKLIETNT---QKIGTEKAKY 56  
H90-S2\_Csep1C MKKQILASILV GALAVSSASAWSLFGGEREKPNYDYSADKKLIETNT---QKIGTEKAKY 57  
P13UCO-S1\_Csep1C MKKQILASVLASVLATSSVYAWGF-GSSREKPNYDYSADKKLIETNT---QKIGTEKAKY 56  
P27CDO-S1\_Csep1C MKKQILASVLASVLATSSVYAWGF-GSSREKPNYDYSADKKLIETNT---QKIGTEKAKY 56  
H290-S1\_Csep1C MKKQILASVLASVLATSSVYAWGF-GSSREKPNYDYSADKKLIETNT---QKIGTEKAKY 56  
P2CDO3\_Csep1C MKKQILASVLASVLATSSVYAWGF-GSSKEKPNYDYSGEKELMSLSSFS DKDLRIDDAKY 59  
P2CDO-S6\_Csep1C MKKQILASVLASVLATSSVYAWGF-GSSKEKPNYDYSGEKELMSLSSFS DKDLRIDDAKY 59  
P1CDO3\_Csep1C MKKQILASVLV GALTAGSASAWSLFGGDREKPNYDYSGEKELMSLSSFS DKDLRIDDAKY 60  
P20CDO-S1\_Csep1C MKKQILASILASVLATSSVYAWGF-GSSREKPNYDYSGEKELMSLSSFS DKDLRIDDAKY 59  
P20CDO-S3\_Csep1C MKKQILASILASVLATSSVYAWGF-GSSREKPNYDYSGEKELMSLSSFS DKDLRIDDAKY 59  
H301\_Csep1C MKKQILASVLASVLATSSVYAWGFGSSKEKPNYDYSGEKELMSLSSFS DKDLRIDDAKY 60  
P11CDO-S1\_Csep1C2 MKKQILASVLASVLATSSVYAWGFGSSKEKPNYDYSGEKELMSLSSFS GNNLRIDDAKY 60  
P21CDO-S2\_Csep1C MKKQILASVLASVLAISSVYAWGF-GSSREKPNYDYSGEKELMSLSSFS DKDLRIDDAKY 59  
H210-S1\_Csep1C MKKQILASVLASVLATSSVYAWGFGSSREKPNYDYSGEKELMSLSSFS DKDLRIDDAKY 60  
\*\*\*\*\*:\*...\*: \*. \*\*.: \*..:\*\*\*\*\*.\*:..: . : : \*\*

P2CDO4\_Csep1P WCFDKGNDLGCLSL EKLEALESKDLKKVVKFYEKT IPEYCYDKKFAPACNIPALDLIQK 117  
P13UCO-S3\_Csep1C WCFDKGNDLGCLSL EKLEALESKDLKKVVKFYEKT IPEYCYDKKFAPACNIPALDLIQK 117  
P26UCO-S1\_Csep1C WCFDKGNDLGCLSL EKLEALESKDLKKVVKFYEKT IPEYCYDKKFAPACNIPALDLIKYK 116  
P2CDO4\_Csep1C WCFDKGNDLGCLSL EKLEALESKDLKKVVKFYEKT IPEYCYDKKFAPACNIPALDLIKYK 116  
P20CDO-S2\_Csep1P WCFDKGNDLGCLSL EKLEALESKDLKKVVKFYEKT IPEYCYDKKFAPACNIPALDLIKYK 116  
P20CDO-S3\_Csep1P WCFDKGNDLGCLSL EKLEALESKDLKKVVKFYEKT IPEYCYDKKFAPACNIPALDLIKYK 116  
P16UCO-S2\_Csep1C WCFDKGNDLGCLWLEKLEAMESKDLKKVVNFYEKT IPEYCYDKKFAPACNIPALDLIKEK 117  
H110-S2\_Csep1C WCLDQGNDLGCLALEKREALANKDLKKVVNFYEKT IPEYCYEKKFAPACNIPALDLILYK 116  
P11CDO-S1\_Csep1C WCLDQGNDLGCLALEKREALANKDLKKVVNFYEKT IPEYCYEKKFAPACNIPALDLILYK 116  
P7UCO-S2\_Csep1C WCLDQGNDLGCLALEKREALANKDLKKVVNFYEKT VPEYCYEKKFAPACNIPALDLILYK 116  
H90-S1\_Csep1C WCLDQGNDLGCLALEKREALANKDLKKVVNFYEKT VPEYCYEKKFAPACNIPALDLILYK 116  
H200-S1\_Csep1C WCFDKGNDLGCLWLEKLEAMESKDLKKVVNFYEKT IPEYCYDKKFAPACNIPALDLIKWK 117  
P18CDO-S1\_Csep1C WCLDQGNDLGCLALEKLEALKSKDLKKVINYYEKT IPEYCYDKKFAPACNIPAHDLIEWK 116  
H90-S2\_Csep1C WCLDQGNDLGCLALEKLEALKSKDLKKVINYYEKT IPEYCYDKKFAPACNIPALDLIKWK 117  
P13UCO-S1\_Csep1C WCLDQGNDLGCLALEKLEALKSKDLKKVINYYEKT IPEYCYDKKFAPACNIPALDLIKWK 116  
P27CDO-S1\_Csep1C WCLDQGNDLGCLALEKLEALKSKDLKKVINYYEKT IPEYCYDKKFAPACNIPALDLIKWK 116  
H290-S1\_Csep1C WCLDQGNDLGCLALEKLEALKSKDLKKVINYYEKT IPEYCYDKKFAPACNIPALDLIKWK 116  
P2CDO3\_Csep1C WCLDQGNDLGCIWLDKLEALASKDIKKVANFYEKT VPEYCYDKKFAPACNIPALDLIKWK 119  
P2CDO-S6\_Csep1C WCLDQGNDLGCIWLDKLEALASKDIKKVANFYEKT VPEYCYDKKFAPACNIPALDLIKWK 119  
P1CDO3\_Csep1C WCLDQGNDLGCIWLDKLEALASKDIKKVANFYEKT VPEYCYDKKFAPACNIPARDLIKWK 120  
P20CDO-S1\_Csep1C WCLDQGNDLGCIWLDKLEALASKDIKKVANFYEKT VPEYCYDKKFAPACNIPALDLIKWK 119  
P20CDO-S3\_Csep1C WCLDQGNDLGCIWLDKLEALASKDIKKVANFYEKT VPEYCYDKKFAPACNIPALDLIKWK 119  
H301\_Csep1C WCLDQGNDLGCIWLDKLEALASKDIKKVTNFYEKT VPEYCYDKKFAPACNIPALDLIKWK 120  
P11CDO-S1\_Csep1C2 WCLDQGNDLGCIWLDKLEALASKDIKKVANFYEKT VPEYCYDKKFAPACRIPAFDLIKDK 120  
P21CDO-S2\_Csep1C WCLDQGNDLGCIWLDKLEALASKDIKKVTNFYEKT VPEYCYDKKFAPACNIPAHDLIDWK 119  
H210-S1\_Csep1C WCLDQGNDLGCIWLDKLEALASKDIKKVANFYEKT VPEYCYDKKFAPACNIPARDLIDWK 120  
\*\*.\*:\*\*\*\*\*: \*.\* \*\*: .\*\*:\* \*\* ::\*:\*:\*:\*:\*:\*:\*:\*:\*:\*:\* \* \* \* \*
