# Supplementary material for: Genomic analysis of oral Campylobacter concisus strains identified a potential bacterial molecular marker associated with active Crohn’s disease
Source: PubMed Central journal article supplement (PMC5893538; doi:10.1038/s41426-018-0065-6), 2018-04-11
Supplement: 41426_2018_65_MOESM8_ESM.pdf [file 41426_2018_65_MOESM8_ESM.pdf]

Supplementary Figure S6

A

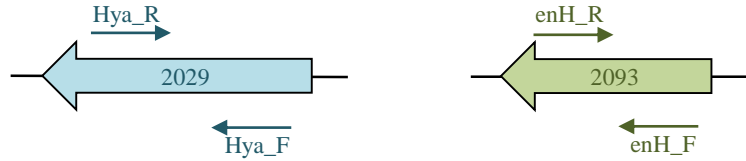

| Gene           | Locus tag  | Primer name | Primer sequence (5'→3') | Annealing temp (°C) | Cycles | Size (bp) |
|----------------|------------|-------------|-------------------------|---------------------|--------|-----------|
| Hypothetical_1 | CCS77_2029 | Hya_F       | ATGACCGCAACATAGGGTGG    | 60                  | 35     | 113       |
|                |            | Hya_R       | GTCACAACCGACCTCATGGT    |                     |        |           |
| Hypothetical_2 | CCS77_2093 | enH_F       | GGCGTGGAAGTCAAAGAAGA    | 59                  |        | 112       |
|                |            | enH_R       | TTTCAAGTGTCCAAGCGAGA    |                     |        |           |

B

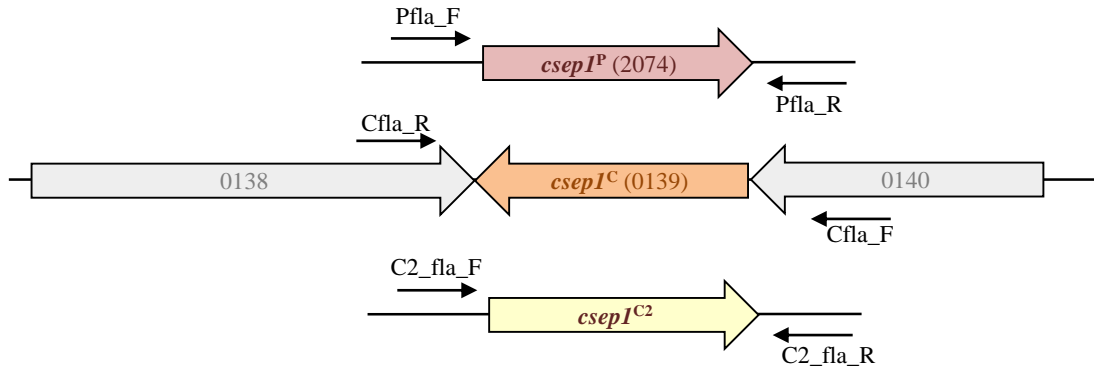

| Target                                                       | Primer name | Primer sequence (5'→3')   | Annealing temp (°C) | Cycles | Size (bp) |
|--------------------------------------------------------------|-------------|---------------------------|---------------------|--------|-----------|
| Flanking sequences of <i>csepI</i> <sup>P</sup> (CCS77_2074) | Pfla_F      | TGCCATGGAGCTTTGGCTTA      | 59                  | 35     | 964       |
|                                                              | Pfla_R      | TGGTCTGGCTATCGTTGGAA      |                     |        |           |
| Flanking sequences of <i>csepI</i> <sup>C</sup> (CCS77_0139) | Cfla_F      | CCTGATGTGGTTGAGAGTGT      | 59                  |        | 1300-700  |
|                                                              | Cfla_R      | GGGCAGATCAAGACAAGGCT      |                     |        |           |
| Flanking sequences of <i>csepI</i> <sup>C2</sup>             | C2fla_F     | GCTTTTTGAAATTATAGCCACTTCC | 58                  | 924    |           |
|                                                              | C2fla_R     | TTCAAAAATGCACCACTGGAGAA   |                     |        |           |

C

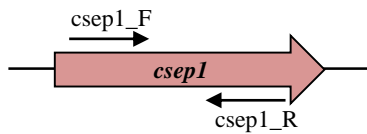

| Gene         | Primer name | Primer sequence (5'→3') | Annealing temp (°C) | Cycles | Size (bp) |
|--------------|-------------|-------------------------|---------------------|--------|-----------|
| <i>csep1</i> | csep1_F     | GCTTCAGTCTTAGCCAGCGT    | 58                  | 35     | 454       |
|              | csep1_R     | CATTGCAGCCATATTCAAGC    |                     |        |           |
